# Supplementary material
Source: PubMed Central journal article supplement (PMC7324191)

## Supplementary materials

### **Sel1L-Hrd1 ER-associated degradation maintains $\beta$ -cell identity via TGF $\beta$ signaling**

Neha Shrestha<sup>1</sup>, Tongyu Liu<sup>2</sup>, Yewei Ji<sup>1</sup>, Rachel B. Reinert<sup>3</sup>, Mauricio Torres<sup>1</sup>, Xin Li<sup>4</sup>, Maria Zhang<sup>5</sup>, Chih-Hang Anthony Tang<sup>6</sup>, Chih-Chi Andrew Hu<sup>6</sup>, Chengyang Liu<sup>7</sup>, Ali Naji<sup>7</sup>, Ming Liu<sup>3,4</sup>, Jiandie D. Lin<sup>2</sup>, Sander Kersten<sup>8</sup>, Peter Arvan<sup>1,3</sup>, Ling Qi<sup>1,3\*</sup>

Materials and methods

9 Supplementary figures with figure legends and one table

## MATERIALS AND METHODS

**Pulse labelling of islets.** Around one hundred islets from wild-type and knockout mice were washed twice in prewarmed Met/Cys-deficient medium plus 1% BSA and 10 mM Hepes (pH 7.35). Islets were then metabolically labeled with <sup>35</sup>S-labeled amino acids in the same medium for 12 min. Labeled islets were briefly washed once with RPMI medium 1640 containing 10% FBS and either directly immersed in lysis buffer or chased for 1 hour or 2 hour at 37°C in RPMI medium 1640 (11.1 mM glucose plus 10% FBS). The media were collected, and the islets were lysed in RIPA buffer. Lysate aliquots were evaluated for trichloroacetic acid-precipitable radioactivity to normalize the immunoprecipitations.

**Transfection and immunoprecipitation.** HEK293T cells were transfected with plasmids within 16-22 hr after plating with lipofectamine 2000 and harvested around 24 hr after. HRD1<sup>-/-</sup> HEK cells were generated as previously described (1). For immunoprecipitation, cells were lysed in a buffer containing 150 mM NaCl, 50 mM Tris-HCl pH 7.5, 1 mM EDTA, 1% NP-40, protease inhibitors and phosphatase inhibitors, and 10 mM N-ethylmaleimide. A total of 1-2 mg protein lysates was incubated with antibody coated agarose beads overnight with gentle rocking at 4°C. Immuno-complexes were washed in a buffer containing 137 mM NaCl, 20 mM Tris-HCl pH 7.5, 2 mM EDTA, and 10% glycerol and eluted by boiling at 95°C for 5 min in SDS sample buffer.

**In vitro glucose stimulated insulin secretion.** Insulin secretion from isolated islets were monitored using batch incubation methods. 10 similar sized islets were pre-cultured at 37°C in 1X KRH (Alfa Aesar, #J67795AP) containing 0.5% BSA and 2 mM glucose for 1 hour. Islets were then incubated in 1X KRH containing 2 mM glucose and 16.7 mM glucose for 1 hour each and supernatant was collected to determine insulin secretion levels. Islets were then recovered and sonicated in acid-ethanol to obtain total insulin content. Insulin levels were determined using insulin ELISA kit (Crystal Chem #90080).

1. Sun S, Shi G, Sha H, Ji Y, Han X, Shu X, et al. IRE1a is an endogenous substrate of endoplasmic-reticulum-associated degradation. *Nat Cell Biol.* 2015;17(12):1546-55.

Table S1. Patient information for human pancreas donors.

|   | HPAP Identifier | Sex/Age | BMI  | Medical History | HbA1c | GSIR |
|---|-----------------|---------|------|-----------------|-------|------|
| 1 | HPAP-001        | M/47yo  | 32.2 | T2DM 18 yrs     | 5.7   | 1.3  |
| 2 | HPAP-007        | F/65yo  | 42.6 | T2DM 4 yrs      | 5.9   | 1.41 |
| 3 | HPAP-010        | F/42yo  | 36.8 | T2DM 2yrs       | 6     | 1.11 |
| 4 | HPAP-013        | F/28yo  | 41.6 | T2DM >5 yrs     | 6.3   | 1.46 |
| 5 | ICRH114         | F/57yo  | 32   | No HX DIAB      | 5     | 1.35 |
| 6 | ICRH120         | 66      | 22.5 | No HX DIAB      | NA    | 1.27 |
| 7 | HPAP-006        | 46      | 19.1 | No HX DIAB      | 5.3   | 1.41 |
| 8 | HPAP-022        | 39      | 34.7 | No HX DIAB      | 4.7   | 1.31 |

GSIR: glucose-stimulated insulin release.

## SUPPLEMENTARY FIGURES AND FIGURE LEGENDS

**Figure S1. *Sel1L*-*Hrd1* expression in pancreatic islets.** (A-B) ScRNA-seq analysis of mouse islets (7-week-old, males) showing the expression, expressed as unique molecular identifiers (UMI), of *Sel1L* and *Hrd1* in distinct islet cell populations. (C-D) Representative confocal images of *Sel1L* (C) and *Hrd1* (D) with insulin on WT mouse pancreas sections.

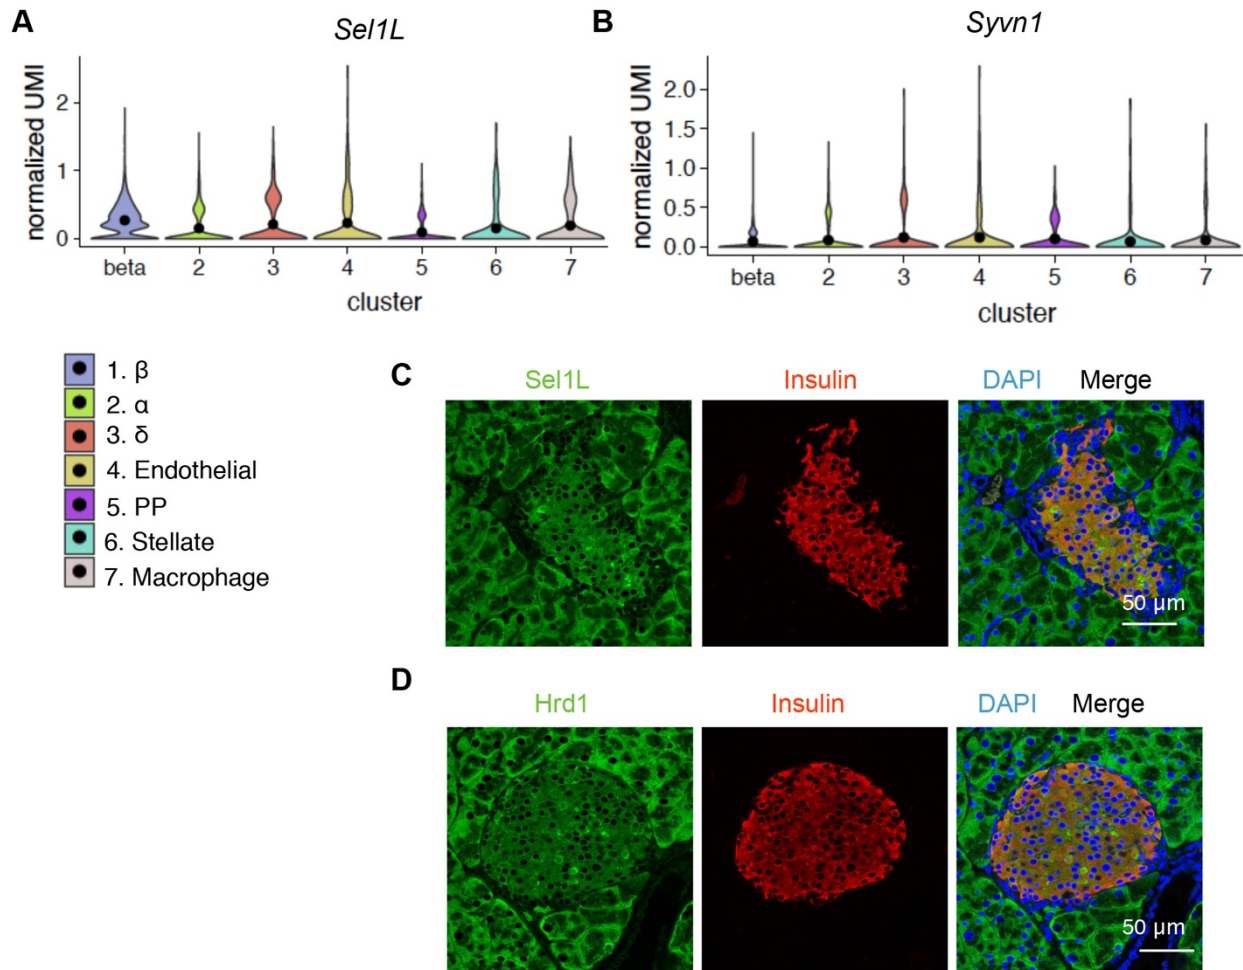

**Figure S2. *Sel1L<sup>Ins1</sup>* mice developed impaired glucose tolerance as early as 5 weeks, preceding *Atg7<sup>Ins1</sup>* mice.** Glucose tolerance test for *Sel1L<sup>Ins1</sup>* (A, C) and *Atg7<sup>Ins1</sup>* (B, D) at indicated ages (n=5-6 per group) with quantitation of area-under-curve shown on the right. Values, mean  $\pm$  SEM; n.s., not significant; \*, p<0.05; \*\*, p<0.01 by unpaired Student's t-test.

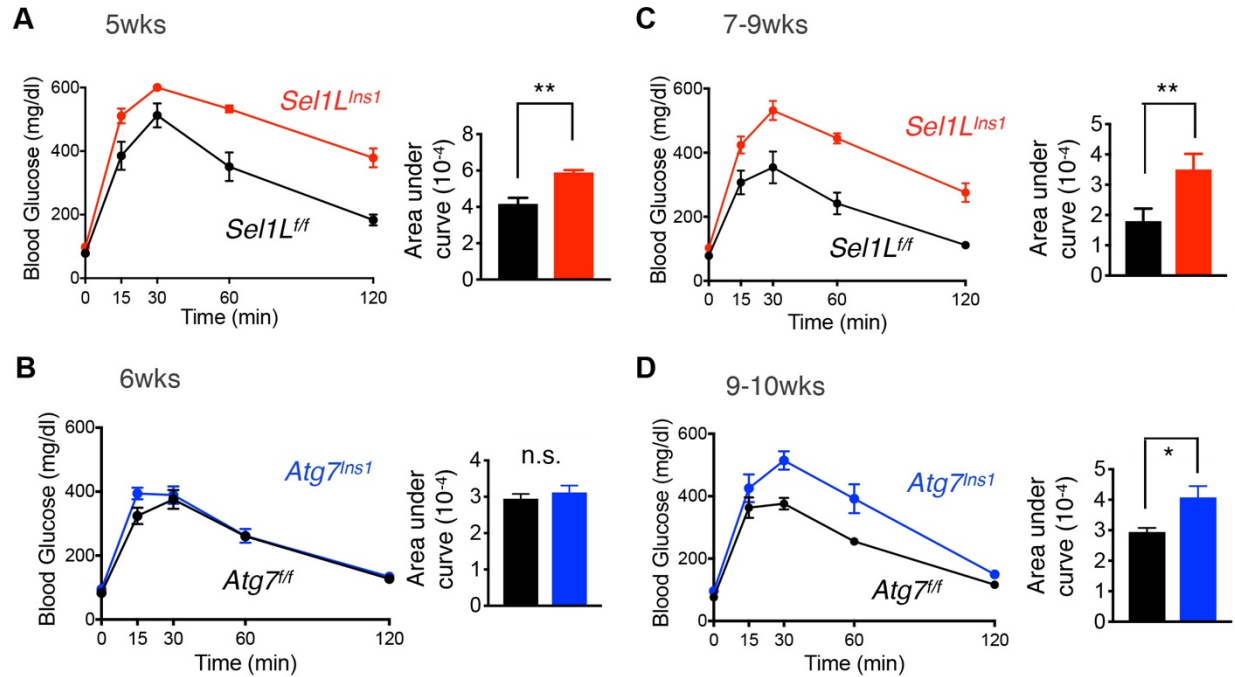



**Figure S4. Loss of Sel1L had no effect on  $\beta$  proliferation, death, or size.** Representative confocal images of Ki67 (A), TUNEL (B) (n=5-6 per genotype) and E-cadherin (C) (two independent repeats) staining in pancreatic sections.

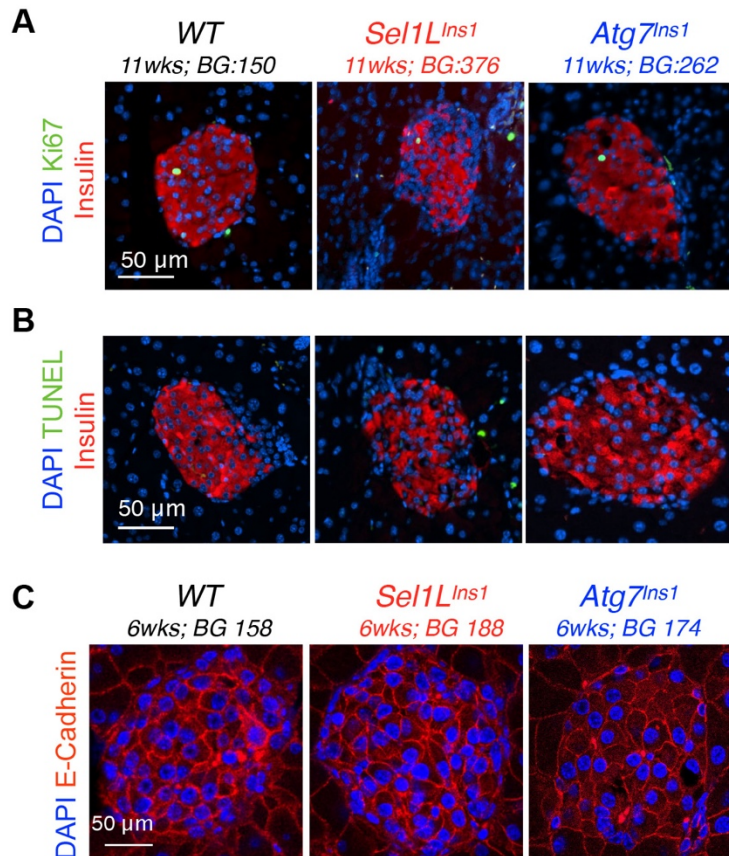

**Figure S5. Loss of *Sel1L* did not impair proinsulin maturation and insulin secretion.** (A) Western blot of *Sel1L<sup>Ins1</sup>* and *Atg7<sup>Ins1</sup>* islets (n=2 mice per group). Tubulin, a loading control. (B) Phos-tag-based western blot analysis of Ire1 $\alpha$  phosphorylation in WT and *Sel1L<sup>Ins1</sup>* islets (n=2 mice per group). (C) RT-PCR analyses of percent of spliced *Xbp1s* to unspliced *Xbp1u* mRNA in islets (n=2 mice per group). Tunicamycin (Tm)-injected liver, a positive control. L32, a loading control. (D) Pulse chase analysis of islets isolated from 7-week old mice (2 independent repeats). (E) Representative immunofluorescence images of BiP and proinsulin (n=3 mice each) in pancreatic sections. (F) Total insulin content in isolated primary islets from WT and *Sel1L<sup>Ins1</sup>* mice (6 weeks). (G-H) GSIS in WT and *Sel1L<sup>Ins1</sup>* islets in medium containing low (2.8 mM) or high (16.7 mM) glucose. Secretion shown before (G) and after normalization to total content (H). Values, mean  $\pm$  SEM. n.s., not significant; \*,  $p < 0.05$ ; \*\*\*\*,  $p < 0.0001$  by unpaired Student's t-test.

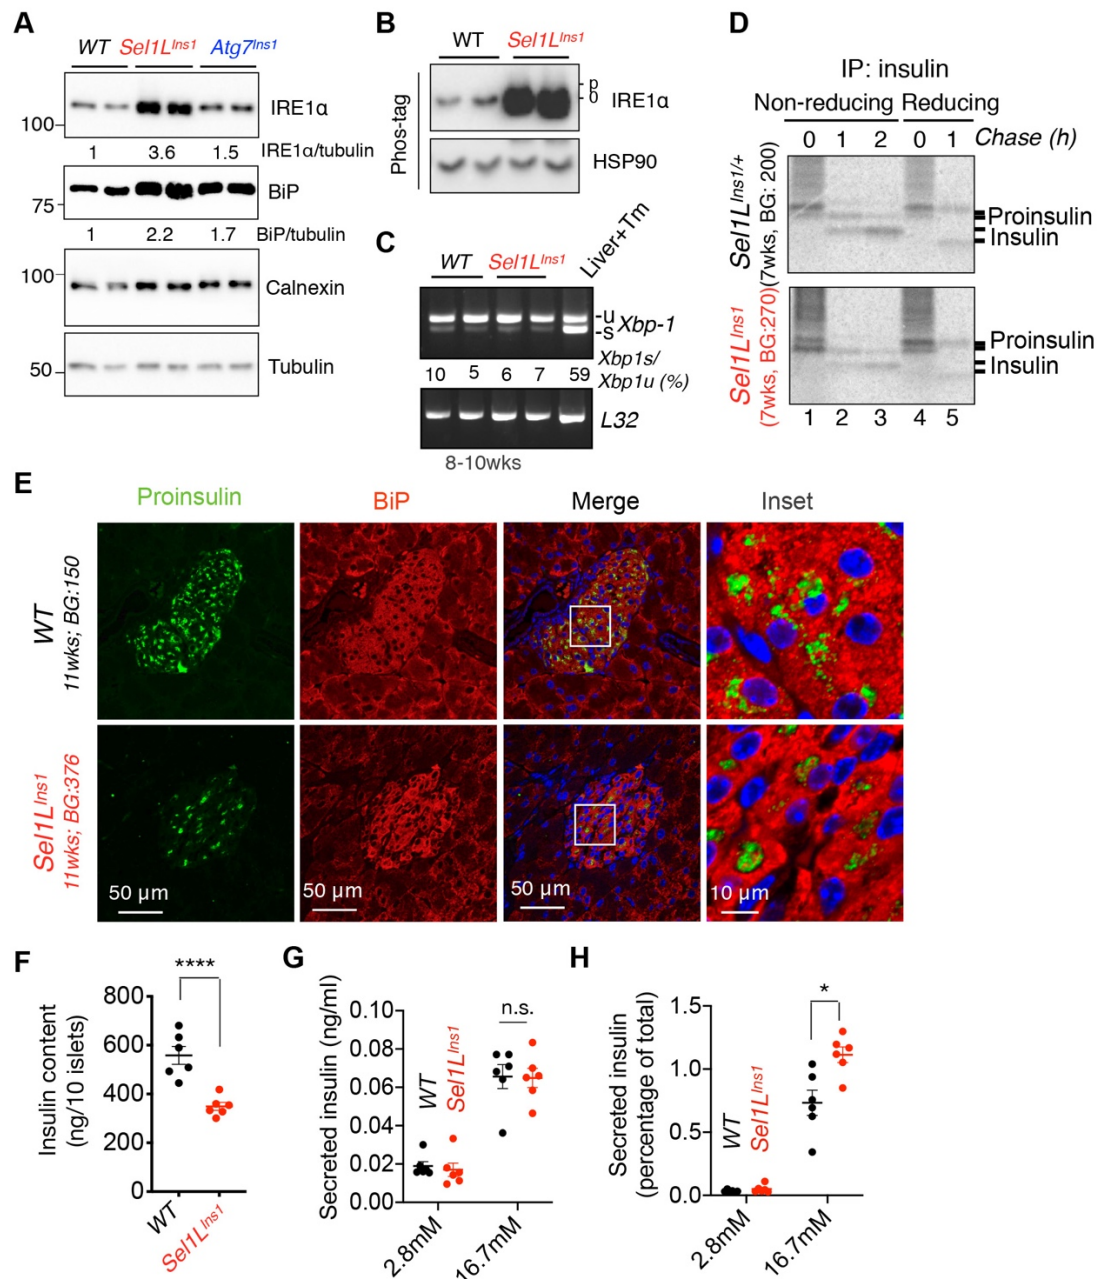

**Figure S6. Single cell (sc)RNA-Seq analysis of primary islets identifies seven major clusters.** (A-B) Identification of major clusters based on reference markers.

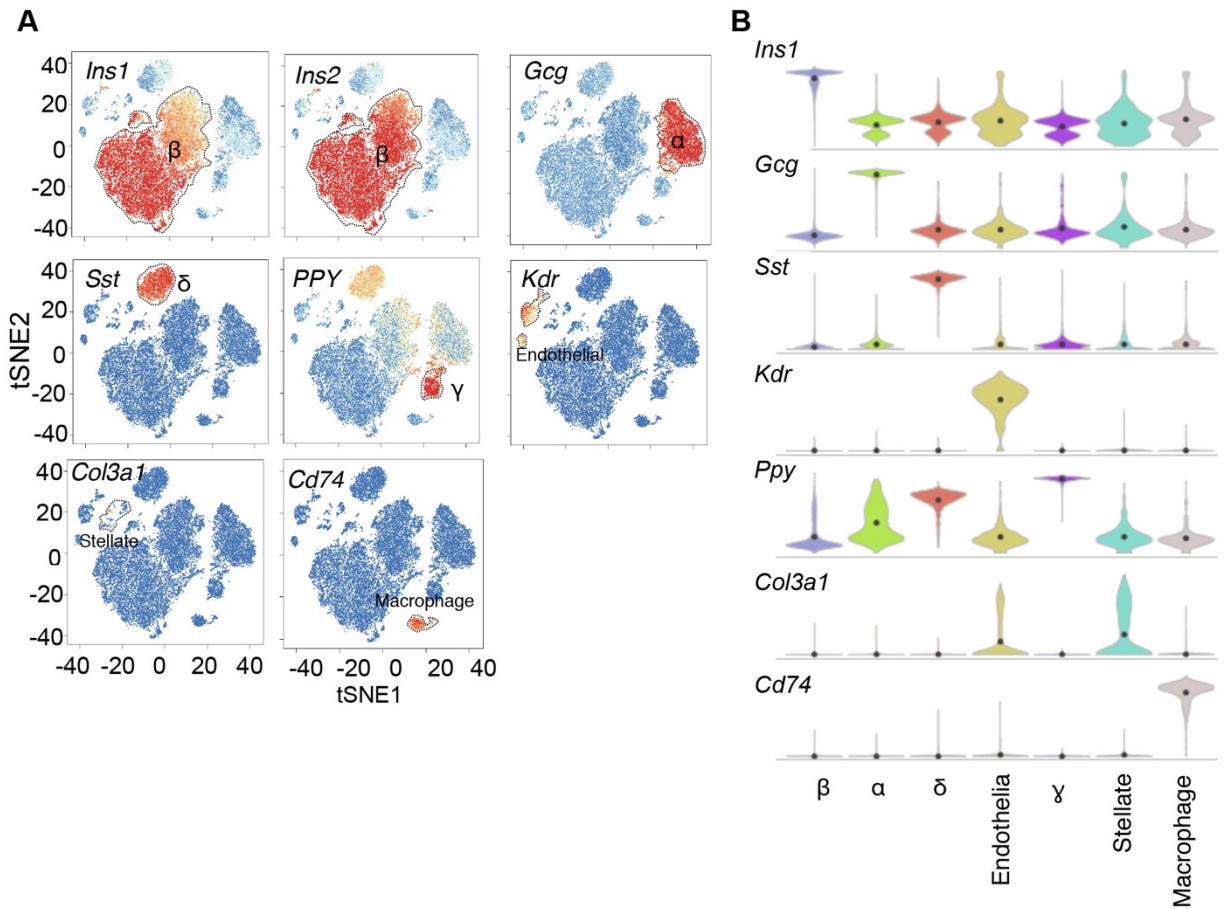

**Figure S7. *Sel1L* deficiency reduced Ucn3 expression in  $\beta$ -cells.** Representative confocal images of Ucn3 and insulin in pancreatic sections (n=2 mice each for each genotype).

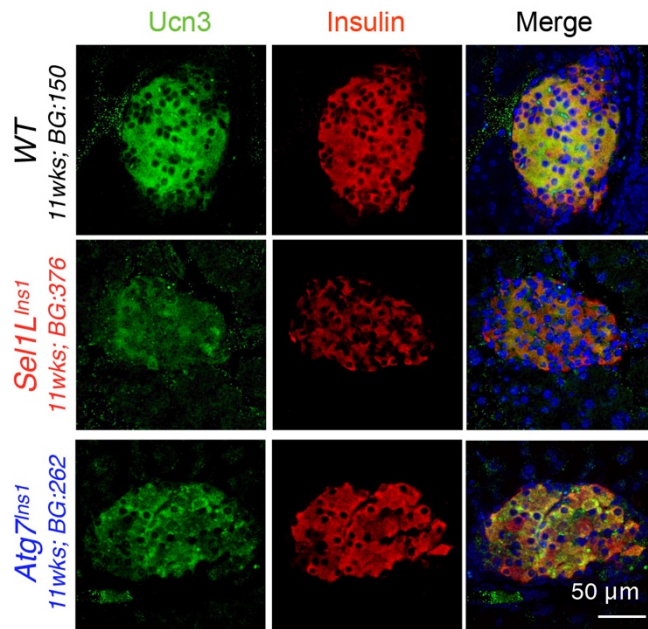

**Figure S8. Sel1L-Hrd1 ERAD regulated TGFβ signaling in β cells.** (A) GSEA analysis of top upregulated pathways from microarray analysis. (B) Heatmap representation of a set of genes associated with TGFβ signaling in β cell clusters. (C) Western blot of His-immunoprecipitates of His-TGFβR1-transfected HEK293T cells expressing a combination of plasmids as indicated, showing ubiquitination of TGFβ receptor I (TGFβRI). C2A Hrd1, an Hrd1 E3-ligase dead mutant. Two independent repeats.

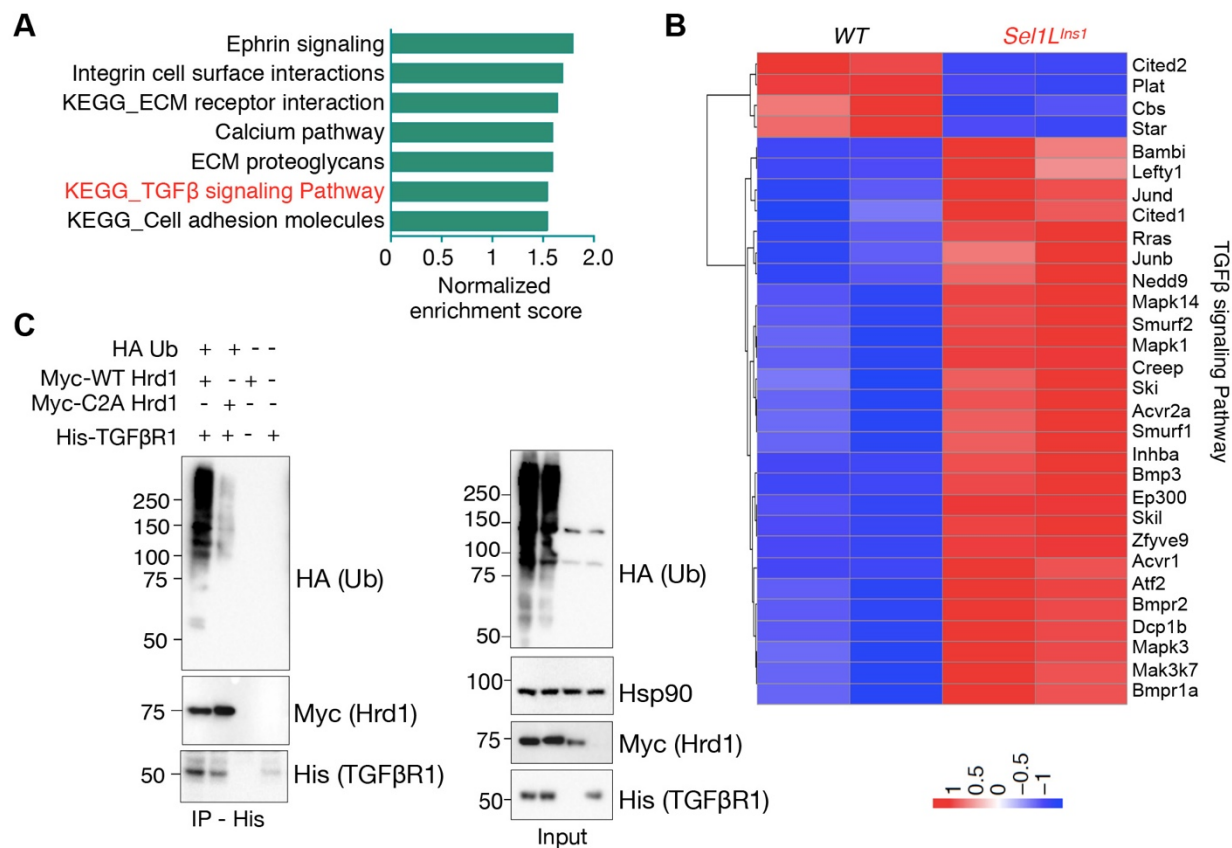

**Figure S9. Inhibition of TGF $\beta$  signaling rescued MafA expression in *Sel1L*<sup>-/-</sup> islets.** (A) Western blot analysis of total and phosphorylated Smad2/3 in primary islets treated with DMSO or 10  $\mu$ M TGF $\beta$ RI for 24 hr (two independent repeats). (B) Representative immunofluorescence images of MafA in dispersed primary islets treated with DMSO or 10  $\mu$ M TGF $\beta$ RI for 24 hr (two independent repeats).

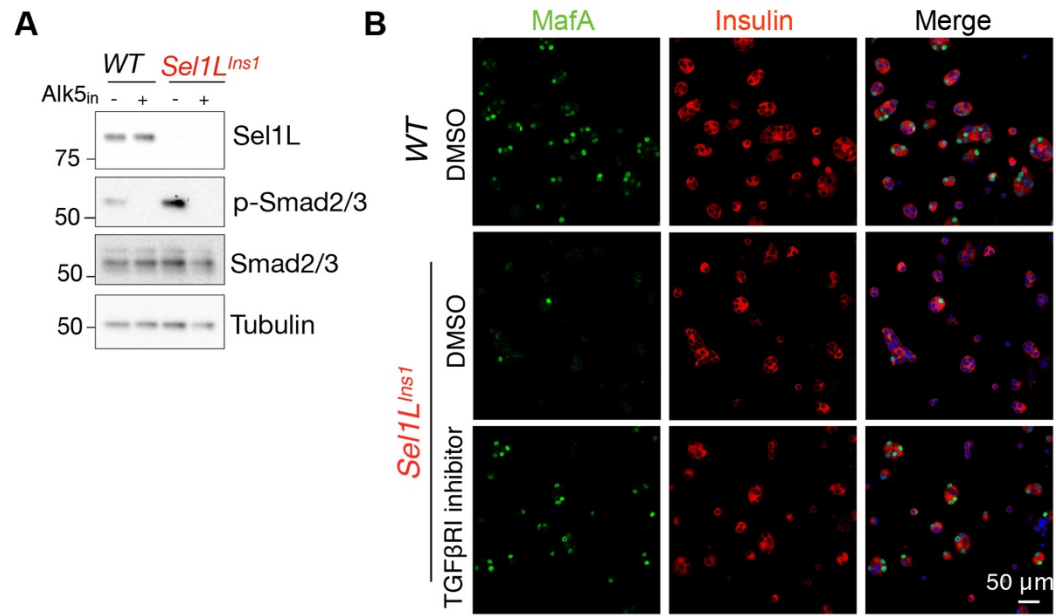

Supplement: jci-130-134874-s044.pdf [file jci-130-134874-s044.pdf]
